# Supplementary material for: Genomic and metabolomic characterization of Acinetobacter calcoaceticus (DT1) and Citrobacter braakii (S10) reveal functional traits for plant stress alleviation and sustainable agriculture
Source: Research Square preprint supplement (doi:10.21203/rs.3.rs-7900185/v1), 2025-11-17
Supplement: Supplementary file 1 [file 4ad8d7114f48fba26324e692.xlsx]

## Sheet: Table S1 (A-B)
Table S1-A: dDDH calculations values between S10 and all the publicly available type strain sequences of Citrobacter species
Query genome	Reference genome	DDH (Formula 2)
S10	Citrobacter braakii ATCC 51113	90.7
S10	Citrobacter europaeus 97/79	53.2
S10	Citrobacter arsenatis LY-1T	51.5
S10	Citrobacter portucalensis A60	48.6
S10	Citrobacter freundii NBRC 12681	48.2
S10	Citrobacter meridianamericanus BR102	47.4
S10	Citrobacter werkmanii NBRC 105721	42.9
S10	Citrobacter cronae Tue2-1T	42.8
S10	Citrobacter youngae CCUG 30791	39.4
S10	Citrobacter pasteurii CIP 55.13	38.9
Table S1-B: Pairwise ANI values among S10 and 13 different species in the genus Citrobacter
	S10 starin	Citrobacter amalonaticus GTA-817-RBA-P2	Citrobacter freundii FDAARGOS_61	Citrobacter europaeus 97/79 [T]	Citrobacter braakii GN02600	Citrobacter freundii ATCC 8090 = MTCC 1658 = NBRC 12681 ATCC 8090 [T]	Citrobacter arsenatis LY-1 [T]	Citrobacter freundii GTC 09479	Citrobacter werkmanii NBRC 105721 [T]	Citrobacter freundii CAV1741	Citrobacter braakii GTA-CB04	Citrobacter braakii GTA-CB01	Citrobacter braakii FDAARGOS 1421 [T]	Citrobacter braakii ATCC 51113 [T]
S10	100	98.51	93.41	93.35	98.57	92.17	92.93	92.16	90.67	92.22	98.73	99.11	98.68	98.66
Citrobacter amalonaticus GTA-817-RBA-P2	98.41	100	93.10	92.88	98.68	91.79	92.55	92.08	90.54	92.02	98.43	98.38	98.73	98.69
Citrobacter freundii FDAARGOS_61	93.10	92.95	100	98.93	92.95	92.19	93.80	92.11	90.53	92.22	92.85	93.03	92.91	92.89
Citrobacter europaeus 97/79 [T]	92.97	92.55	98.86	100	92.66	91.93	93.65	91.95	90.57	91.94	92.79	92.96	92.65	92.67
Citrobacter braakii GN02600	98.43	98.55	93.10	93.00	100	91.97	92.55	91.94	90.49	91.92	98.39	98.25	98.70	98.69
Citrobacter freundii ATCC 8090 = MTCC 1658 = NBRC 12681 ATCC 8090 [T]	92.12	91.96	92.41	92.28	92.08	100	92.18	98.71	90.34	98.68	92.05	92.13	92.03	92.03
Citrobacter arsenatis LY-1 [T]	92.63	92.41	93.81	93.74	92.47	92.03	100	91.89	90.57	91.98	92.54	92.59	92.56	92.56
Citrobacter freundii GTC 09479	92.06	92.14	92.23	92.24	92.04	98.68	92.01	100	90.34	98.55	91.99	92.08	92.05	92.05
Citrobacter werkmanii NBRC 105721 [T]	90.48	90.55	90.50	90.60	90.44	90.21	90.62	90.21	100	90.19	90.41	90.48	90.39	90.39
Citrobacter freundii CAV1741	92.12	92.01	92.24	92.34	92.00	98.59	92.00	98.53	90.35	100	91.91	92.08	91.94	91.91
Citrobacter braakii GTA-CB04	98.76	98.58	93.22	93.18	98.62	92.04	92.76	92.07	90.67	92.07	100	98.56	98.59	98.56
Citrobacter braakii GTA-CB01	99.04	98.42	93.20	93.23	98.39	92.08	92.66	92.07	90.58	92.13	98.28	100	98.36	98.36
Citrobacter braakii FDAARGOS 1421 [T]	98.51	98.61	92.96	92.58	98.63	91.89	92.56	91.94	90.29	91.86	98.25	98.28	100	99.95
Citrobacter braakii ATCC 51113 [T]	98.49	98.54	92.97	92.57	98.63	91.87	92.59	91.95	90.38	91.88	98.29	98.25	99.94	100

## Sheet: Table S2 (A-B)
Table S2-A: dDDH calculations values between DT1 and all the publicly available type strain sequences of Acinetobacter species
Query genome	Reference genome	DDH (Formula 2)
DT1	Acinetobacter calcoaceticus DSM 30006	73.5
DT1	Acinetobacter oleivorans JCM 16667	44.7
DT1	Acinetobacter oleivorans KCTC 23045	44.6
DT1	Acinetobacter geminorum J00019T	39.1
DT1	Acinetobacter dijkshoorniae JVAP01	39.1
DT1	Acinetobacter lactucae NRRL B-41902	38.9
DT1	Acinetobacter pittii CIP 70.29	38.8
DT1	Acinetobacter seifertii NIPH 973	31.6
DT1	Acinetobacter chenhuanii XH1741	31.4
DT1	Acinetobacter nosocomialis NIPH 2119	31.2
Table S2-B: Pairwise ANI values among DT1 and 13 different species in the genus Acinetobacter
	DT1 strain	Acinetobacter calcoaceticus NCTC12983	Acinetobacter calcoaceticus DSM 30006	Acinetobacter calcoaceticus P23	Acinetobacter calcoaceticus KCTC 2357	Acinetobacter oleivorans PF1	Acinetobacter oleivorans DR1	Acinetobacter oleivorans CIP 110421	Acinetobacter oleivorans KCTC 23045	Acinetobacter pittii ABBL074	Acinetobacter pittii ABBL078	Acinetobacter pittii CIP70.29	Acinetobacter lactucae ANC 4052	Acinetobacter lactucae ABBL098
DT1 strain	100	96.78	96.74	95.7	96.76	93.11	91.26	91.3	91.31	89.24	89.22	89.3	89.48	89.42
Acinetobacter calcoaceticus NCTC12983	96.87	100	99.96	96.07	99.95	92.96	91.31	91.33	91.34	89.36	89.31	89.21	89.59	89.39
Acinetobacter calcoaceticus DSM 30006	96.83	100	100	96.11	100	93	91.34	91.35	91.35	89.37	89.34	89.28	89.59	89.34
Acinetobacter calcoaceticus P23	95.43	95.85	95.85	100	95.85	92.68	91.62	91.61	91.6	89.28	89.24	89.24	89.5	89.53
Acinetobacter calcoaceticus KCTC 2357	96.83	100	99.99	96.04	100	92.93	91.25	91.26	91.26	89.33	89.29	89.14	89.5	89.4
Acinetobacter oleivorans PF1	93.2	93.1	93.1	92.97	93.07	100	90.91	90.89	90.89	88.97	88.9	88.9	89.19	89.05
Acinetobacter oleivorans DR1	91.16	91.17	91.17	91.74	91.16	90.73	100	99.98	99.98	90.4	90.49	90.5	90.68	90.61
Acinetobacter oleivorans CIP 110421	91.18	91.17	91.17	91.64	91.18	90.65	99.99	100	99.99	90.38	90.5	90.49	90.6	90.6
Acinetobacter oleivorans KCTC 23045	91.15	91.17	91.17	91.67	91.17	90.71	100	100	100	90.47	90.59	90.53	90.55	90.65
Acinetobacter pittii ABBL074	89.16	89.21	89.2	89.31	89.21	88.77	90.6	90.61	90.61	100	97.04	97.09	92.72	92.6
Acinetobacter pittii ABBL078	89.33	89.29	89.3	89.48	89.3	88.94	90.69	90.7	90.7	97.09	100	99.75	92.76	92.74
Acinetobacter pittii CIP70.29	89.34	89.22	89.22	89.44	89.22	88.91	90.66	90.67	90.67	97.15	99.76	100	92.83	92.64
Acinetobacter lactucae ANC 4052	89.48	89.55	89.56	89.72	89.56	89.17	90.78	90.78	90.78	92.77	92.77	92.85	100	96.23
Acinetobacter lactucae ABBL098	89.35	89.28	89.28	89.55	89.27	88.82	90.52	90.54	90.52	92.61	92.59	92.5	96.12	100
