# Supplementary material for: Genomic and metabolomic characterization of Acinetobacter calcoaceticus (DT1) and Citrobacter braakii (S10) reveal functional traits for plant stress alleviation and sustainable agriculture
Source: Research Square preprint supplement (doi:10.21203/rs.3.rs-7900185/v1), 2025-11-17
Supplement: Supplementary file 2 [file 6de335696013251562028d3e.xlsx]

## Sheet: Table_S3
Table S3. Genes involved in plant growth-promoting traits of Acinetobacter calcoaceticus DT1
PGP traits	Genes	Gene annotation	Location
IAA biosynthesis	tyrB	tyrosine aminotransferase	3,826,874 -> 3,828,088
	trpE	Anthranilate synthase component 1	3,611,967 <- 3,613,460
	trpC	indole-3-glycerol phosphate synthase	1,152,781 <- 1,153,587
	trpB	tryptophan synthase subunit beta	625,906 -> 627,135
	trpA	Tryptophan synthase alpha chain	630,995 -> 631,798
	trpD	Anthranilate phosphoribosyltransferase	1,153,597 <- 1,154,646
	trpF	N-(5'-phosphoribosyl) anthranilate isomerase	625,263 -> 625,931
	ipdC	Indole-3-pyruvate decarboxylase	1,086,472 -> 1088193
Cytokinin biosynthesis	miaB	isopentenyl-adenosine A37 tRNA methylthiolase	508,068 <- 509,519
	miaA	tRNA dimethylallyltransferase	1,482,657 -> 1,483,601
	miaE	tRNA 2-(methylsulfanyl)-N(6)-isopentenyladenosine(37) hydroxylase	1,014,265 -> 1,014,909
Riboflavin biosynthesis	ribA	GTP cyclohydrolase 2	437,296 -> 437,898
	ribB	3,4-dihydroxy-2-butanone-4-phosphate synthase	100,756 -> 101,877
	ribD	pyrimidine deaminase/reductase	3,663,273 -> 3,664,358
	ribC	Riboflavin synthase	3,661,281 -> 3,661,940
	ribE	6,7-dimethyl-8-ribityllumazine synthase	100,274 -> 100,744
	ribF	bifunctional riboflavin kinase/FMN adenylyltransferase	3,886,192 -> 3,887,193
Phosphate solubilisation	pstB	phosphate ABC transporter ATP binding subunit	1,094,110 -> 1,095,012
	gcd	quinoprotein glucose dehydrogenase	653,904 -> 656,309
	Ppa	inorganic pyrophosphatase	3,682,667 <- 3,683,191
	Ppx	exopolyphosphatase	3,243,658 <- 3,245,178
	ppK	polyphosphate kinase	1,929,565 <- 1,931,640
	phoR	Phosphate regulon sensor protein	115,440 <- 116,798
	phoU	Phosphate-specific transport system accessory protein	3,627,972 <- 3,628,739
	pqqC	Pyrroloquinoline-quinone synthase	1,927,512 <- 1,928,270
Siderophore production	entE	2,3-dihydroxybenzoate-AMP ligase	1,940,602 <- 1,942,266
	entB	enterobactin synthase component B	1,939,712 <- 1,940,581
	entA	2,3-dihydro-2,3-dihydroxybenzoate dehydrogenase	1,994,167 <- 1,994,937
	dat	Diaminobutyrate--2-oxoglutarate aminotransferase	1,081,154 -> 1,082,527
	ddc	L-2,4-diaminobutyrate decarboxylase	1,082,530 -> 1,084,062
	dhbB	Isochorismatase	1,940,581 -> 1,939,712
	dhbC	Isochorismate synthase DhbC	1,943,501 -> 1,942,263
	dhbE	2,3-dihydroxybenzoate-AMP ligase	1,942,266 -> 1,940,602
	dhbF	Dimodular nonribosomal peptide synthase	1,946,044 -> 1,953,195
	feoB	Fe(2+) transporter FeoB	3,643,107 -> 3,641,254
	sbnA	N-(2-amino-2-carboxyethyl)-L-glutamate synthase	1,587,078 -> 1,586,074
	sbnB	N-((2S)-2-amino-2-carboxyethyl)-L-glutamate dehydrogenase	1,586,052 -> 1,585,039
	sbnD	Staphyloferrin B transporter	1,583,323 -> 1,582,118
	bfr	bacterioferritin	361,474 <- 361,938
Nitrogen Fixation	nirB	nitrite reductase catalytic subunit	1,590,071 -> 1,592,617
ACC deaminase	rimM	Ribosome maturation factor	375,698 -> 376,246
	rimO	ribosomal protein S12 methylthiotransferase	1,622,592 -> 1,623,935
	rimI	[Ribosomal protein bS18]-alanine N-acetyltransferase	2,992,216 <- 2,992,683
	rimP	ribosome maturation factor	3,552,890 <- 3,553,414

## Sheet: Table_S4
Table S4. Genes involved in plant growth-promoting traits of Citrobacter braakii S10
PGP traits	Genes	Gene annotation	Location
IAA biosynthesis	ipdC	Indole-3-pyruvate decarboxylase	1,454,324 -> 1,455,976
	aspC	aspartate aminotransferase	3,090,877 -> 3,092,067
	tyrB	tyrosine aminotransferase	4,517,248 <- 4,518,441
	trpE	anthranilate synthase subunit TrpE	2,267,070 <- 2,268,632
	trpC	indole-3-glycerol phosphate synthase	2,264,113 <- 2,265,471
	trpB	tryptophan synthase subunit beta	2,262,909 <- 2,264,102
	trpA	tryptophan synthase subunit alpha	2,262,103 <- 2,262,909
	trpD	anthranilate synthase subunit	2,265,475 <- 2,267,070
Cytokinin biosynthesis	miaB	isopentenyl-adenosine A37 tRNA methylthiolase	3,391,885 -> 3,393,315
	miaA	tRNA dimethylallyltransferase	4,380,977 <- 4,381,927
	miaE	tRNA 2-(methylsulfanyl)-N(6)-isopentenyladenosine(37) hydroxylase	4,273,223 <- 4,273,981
Riboflavin biosynthesis	ribA	GTP cyclohydrolase 2	2,282,173 <- 2,282,763
	ribB	3,4-dihydroxy-2-butanone-4-phosphate synthase	673,619 -> 674,272
	ribD	pyrimidine deaminase/reductase	3,661,655 <- 3,662,758
	ribC	Riboflavin synthase	2,614,473 <- 2,613,826
	ribE	6,7-dimethyl-8-ribityllumazine synthase	3,661,568 <- 3,661,098
	ribF	bifunctional riboflavin kinase/FMN adenylyltransferase	4,121,207 -> 4122145
Phosphate solubilisation	pstB	phosphate ABC transporter ATP binding subunit	4,896,811 -> 4,897,584
	pstC	phosphate ABC transporter membrane subunit	4,894,855 -> 4,895,814
	pstA	phosphate ABC transporter membrane subunit	4,895,814 -> 4,896,704
	Gcd	quinoprotein glucose dehydrogenase	3,987,737 -> 3,990,139
	Ppa	inorganic pyrophosphatase	4,323,036 -> 4,323,563
	Ppx	exopolyphosphatase	1,355,649 <- 1,357,190
	pstS	phosphate ABC transporter periplasmic binding protein	4,893,622 -> 4,894,662
	ppk	polyphosphate kinase	1,357,195 <- 1,359,261
	phoA	alkaline phosphatase	3,702,376 <- 3,703,791
	phnC	phosphonate/phosphate ABC transporter ATP binding subunit	4,454,186 -> 4,454,974
	phnD	phosphonate/phosphate ABC transporter periplasmic binding protein	4,455,055 -> 4,456,071
	phnE	Phosphonate transport system permease protein	4,456,176 -> 4,456,955
	phnG	carbon-phosphorus lyase core complex subunit	4,457,702 -> 4,458,154
	phnH	carbon-phosphorus lyase core complex subunit	4,458,151 -> 4,458,735
	phnI	carbon-phosphorus lyase core complex subunit	4,458,735 -> 4,459,802
	phnJ	carbon-phosphorus lyase core complex subunit	4,459,792 -> 4,460,640
	phnK	carbon-phosphorus lyase subunit	4,460,637 -> 4,461,395
	phnO	aminoalkylphosphonate N-acetyltransferase	4,463,875 -> 4,464,309
Siderophore production	yecD	isochorismatase family protein	2,001,411 <- 2,001,977
	entC	isochorismate synthase EntC	3,453,596 <- 3,454,771
	entE	2,3-dihydroxybenzoate-AMP ligase	3,451,952 <- 3,453,562
	entF	apo-serine activating enzyme	3,461,521 <- 3,465,411
	entB	enterobactin synthase component B	3,451,081 <- 3,451,938
	entD	phosphopantetheinyl transferase	3,469,452 -> 3,470,114
	entA	2,3-dihydro-2,3-dihydroxybenzoate dehydrogenase	3,450,326 <- 3,451,081
	dat	Diaminobutyrate--2-oxoglutarate aminotransferase	2,205,681 -> 2,207,066
	ddc	L-2,4-diaminobutyrate decarboxylase	2,207,082 -> 2,208,545
	dhbA	2,3-dihydro-2,3-dihydroxybenzoate dehydrogenase	3,166,003 -> 3,166,812
	feoA	Fe(2+) transport protein A	328,860 -> 328,633
	feoB	Fe(2+) transporter FeoB	328,614 -> 326,296
	feoC	putative [Fe-S]-dependent transcriptional repressor FeoC	326,284 -> 326,048
	efeB	Deferrochelatase/peroxidase EfeB	3,009,342 -> 3,008,059
	efeO	Iron uptake system component EfeO	3,010,475 -> 3,009,348
	efeU	Ferrous iron permease EfeU	3,011,367 -> 3,010,534
	sbnA	N-(2-amino-2-carboxyethyl)-L-glutamate synthase	3,624,177 -> 3,625,232
	sbnD	Staphyloferrin B transporter	3,705,584 -> 3,704,388
	bfr	bacterioferritin	386,896 -> 387,369
Nitrogen Fixation	nirD	nitrite reductase subunit	359,454 -> 359,780
	nirB	nitrite reductase catalytic subunit	359,777 -> 362,320
	narH	nitrate reductase A subunit beta	2,232,058 -> 2,233,596
	narI	nitrate reductase A subunit gamma	2,234,303 -> 2,234,980
	narV	nitrate reductase Z subunit gamma	2,447,447 -> 2,448,127
	narY	nitrate reductase Z subunit beta	2,448,819 -> 2,450,363
	narZ	nitrate reductase Z subunit alpha	2,450,360 -> 2,454,100
ACC deaminase	rimO	ribosomal protein S12 methylthiotransferase	3,176,868 -> 3,178,193
	rimI	protein N-acetyltransferase	4,178,899 <- 4,179,345
	rimP	ribosome maturation factor	532,904 -> 533,356
	rimK	ribosomal protein S6 modification protein	3,160,983 <- 3,161,885
	rimJ	ribosomal-protein-S5-alanine N-acetyltransferase	2,978,190 <- 2,978,774
	rimL	ribosomal-protein-L12-serine N-acetyltransferase	2,390,462 -> 2,391,007
	rimM	ribosome maturation factor	1,220,982 -> 1,221,533
Flagellar asembly	fliR	Flagellar biosynthetic protein FliR	1,908,757 -> 1,907,972
	fliQ	Flagellar biosynthetic protein FliQ	1,909,035 -> 1,908,766
	fliP	Flagellar biosynthetic protein FliP	1,909,782 -> 1,909,045
	fliO	Flagellar protein FliO	1,910,156 -> 1,909,782
	fliN	Flagellar motor switch protein FliN	1,910,572 -> 1,910,159
	fliM	Flagellar motor switch protein FliM	1,911,573 ->1,910,569
	fliK	Flagellar hook-length control protein	1,913,364 ->1,912,150
	fliJ	Flagellar FliJ protein	1,913,804 ->1,913,361
	fliI	Flagellum-specific ATP synthase	1,915,196 ->1,913,826
	filH	Flagellar assembly protein FliH	1,915,903 ->1,915,196
	fliG	Flagellar motor switch protein FliG	1,916,891 ->1,915,896
	fliF	Flagellar M-ring protein	1,918,566 ->1,916,884
	fliE	Flagellar hook-basal body complex protein FliE	1,918,783 ->1,919,097
	fliA	RNA polymerase sigma factor FliA	1,926,892 ->1,927,611
	fliD	Flagellar hook-associated protein 2	3,826,789 ->3,825,464
	fliS	Flagellar secretion chaperone FliS	1,923,552 ->1,923,145
	fliT	Flagellar protein FliT	1,923,145 ->1,922,774
	flhD	Flagellar transcriptional regulator FlhD	1,961,865 ->1,962,206
	flhC	Flagellar transcriptional regulator FlhC	1,962,206 ->1,962,787
	flhB	Flagellar biosynthetic protein FlhB	1,986,266 ->1,987,417
	flhA	Flagellar biosynthesis protein FlhA	1,987,410 ->1,989,488
	flhE	Flagellar protein FlhE	1,989,488 ->1,989,880
		1989488	1989880	CDS
					gene	flhE
					inference	ab initio prediction:Prodigal:002006
					inference	similar to AA sequence:UniProtKB:P0A1N4
					locus_tag	CFNGLPHK_01880
					product	Flagellar protein FlhE
