# Supplementary material for: Genomic and metabolomic characterization of Acinetobacter calcoaceticus (DT1) and Citrobacter braakii (S10) reveal functional traits for plant stress alleviation and sustainable agriculture
Source: Research Square preprint supplement (doi:10.21203/rs.3.rs-7900185/v1), 2025-11-17
Supplement: Supplementary file 3 [file 9812b0b29b4b0a676cd29b0f.xlsx]

## Sheet: Table_S5
Table S5: Metabolites identified in Acinetobacter calcoaceticus DT1
Bucket	FC (pellet/supernatant)	raw.pval	Metabolites
7.41min : 557.321371m/z	0.016659	4.0181E-16	Perlolyrine
6.77min : 432.237104m/z	0.038673	0.0000000000000050697	Radiosumin
7.24min : 837.439648m/z	0.049952	4.3931E-16	Microcin SF608
5.81min : 661.318387m/z	0.057408	0.000000087147	Maculosin
6.80min : 341.231774m/z	0.088735	0.000000000092701	Leu Pro Ile
4.89min : 137.047754m/z	0.18722	0.000000000020811	2-Aminobenzoic acid
6.09min : 196.121163m/z	0.2556	0.000000000027906	Amiclenomycin
4.95min : 226.095496m/z	0.30398	0.000000085355	Porphobilinogen
6.64min : 416.206706m/z	0.3155	0.000000000000033222	Questiomycin A
5.86min : 291.122281m/z	0.34215	0.00027001	Subaphylline
0.69min : 102.115703m/z	0.38397	0.000006297	Cadaverine
14.96min : 210.137014m/z	2.0098	0.00000000011351	Cyclo(D)-Pro-(D)-Leu
8.78min : 308.079818m/z	2.0323	0.0015506	Chaetominedione
0.53min : 115.063427m/z	2.1253	0.000090107	L-proline
4.70min : 102.046990m/z	2.1775	0.0087949	Ser Ile Thr
8.43min : 1066.608465m/z	2.1975	0.0014485	2-demethylcyclopiamide E
3.91min : 184.084871m/z	2.3097	0.00000000017769	Cyclo-(L-Ala-trans-4-hydroxy-L-Pro)
0.92min : 234.111738m/z	2.6247	0.00010162	Hypoxanthine
3.81min : 223.121013m/z	2.7888	0.000095456	Corallorazine C
4.70min : 148.052543m/z	2.8636	0.00000000016498	Biotin
11.37min : 569.450657m/z	3.025	0.000000000024343	Palmidrol
9.07min : 176.047460m/z	3.0487	0.0000000025568	MBP 1
9.07min : 148.016122m/z	3.0985	0.000000047164	herniarin
12.10min : 449.351089m/z	3.1936	0.0000011672	Diisobutyl phthalate
12.09min : 148.016124m/z	3.3711	0.00017892	Di(2-ethylhexyl) phthalate
0.95min : 225.147920m/z	3.4102	0.000091478	Fusaric acid methyl ester
10.51min : 148.016138m/z	3.5414	0.00000000026657	PHTHALic ANhydride
8.22min : 189.079194m/z	3.9742	0.0000000019124	Indolpropionic acid
6.57min : 182.084615m/z	4.3911	0.0000000028124	Harman
2.79min : 131.094792m/z	4.4573	0.000000000015413	L-Leucine
0.79min : 155.069610m/z	4.5884	0.0000000047557	Histidine
6.26min : 168.068949m/z	4.6896	0.0000000011081	Norharman
5.50min : 226.168305m/z	4.9238	0.0000000000044479	Cyclo-(Leu-Leu)
9.25min : 228.172818m/z	5.8465	0.000000000068467	Xylarinic acid A
0.85min : 103.063395m/z	6.1855	0.0000000044285	gamma-Aminobutyric acid
0.83min : 119.058310m/z	7.0938	0.0000063397	L-homoserine
0.86min : 133.074060m/z	7.9398	0.0000047683	L-Valine
0.91min : 129.079141m/z	10.584	0.000000000030428	2-Aminoheptanedioic acid
11.93min : 309.325046m/z	12.034	0.0012323	N-Hexadecanoylpyrrolidine
0.96min : 117.079116m/z	12.071	0.001544	CI 4
9.25min : 281.196952m/z	14.286	0.00000000016384	4.10-dihydroxy-10-methyl-dodecan-4-olide
0.86min : 147.053272m/z	16.318	0.000000000000021616	5-hydroxynorvaline
4.50min : 163.085883m/z	17.809	7.9796E-18	N.N-Dimethyladenine
7.03min : 158.058032m/z	22.682	0.000000000000099008	2-isopropylmaleate
5.10min : 219.110772m/z	30.174	2.3462E-18	Pantothenic acid
6.14min : 189.042592m/z	66.595	0.0000000000000066481	Kynurenic acid
11.05min : 352.261963m/z	89.79	0.00000000048614	[10]-Gingerdiol
5.02min : 194.115393m/z	89.973	0.000000000014529	Phe Gly
1.83min : 138.043119m/z	125.2	0.0000025698	Urocanic acid
10.75min : 281.272199m/z	129.77	0.0000000000020765	6-Octadecynoic acid
0.91min : 246.121732m/z	143.34	0.0000000000022969	Pipecolic acid
9.50min : 229.240802m/z	162.92	0.000023172	N.N-Dimethyldodecylamine N-oxide
0.91min : 174.100463m/z	192.31	0.0000000000000068331	GUANINE
0.91min : 113.084207m/z	919.04	0.000000000010264	Adenosine 3'-monophosphate
10.43min : 340.345857m/z	1182.3	0.0000000000017638	alpha-Linolenic acid
10.50min : 366.361564m/z	6512.7	0.00000000015444	Farnesylacetone

## Sheet: Table_S6
Table S6: Metabolites identified in Citrobacter braakii S10
Bucket	FC	raw.pval	Metabolites
0.54min : 183.050887m/z	2.5596	0.00000000000000366	Cadaverine
0.57min : 119.037259m/z	7.4718	0.00000000178	Histamine
0.67min : 136.022371m/z	57.217	0.000000000000000221	L-Arginine
0.79min : 155.069610m/z	3.6313	0.00000000701	Corallorazine C
0.83min : 119.058310m/z	9.6648	0.0000245	Hypoxanthine
0.91min : 135.054579m/z	10.292	0.00000000145	Urocanic acid
0.96min : 253.154078m/z	0.32107	0.000000873	N6-Acetyl-L-lysine
1.68min : 132.024655m/z	9.0803	0.0000000000121	Biotin
10.14min : 386.315030m/z	37.279	0.000000501	Serpulanine A
10.19min : 315.277755m/z	2.8888	0.00000000806	Pantothenic acid
10.48min : 279.256444m/z	3.4792	0.00000013	Dehydrotomatine
10.65min : 297.266990m/z	89.243	0.00000000000000248	Betavulgaroside VII
10.87min : 320.233162m/z	5.1954	0.0000344	Gly Phe Val
11.37min : 299.282843m/z	21.874	0.00016957	Dictyoquinazol B
12.72min : 105.079046m/z	7.2355	0.00000112	Leu Pro Ile
14.58min : 133.074064m/z	2.3073	0.00000000000302	Indoline
2.14min : 168.028452m/z	137.47	0.0000317	Cotteslosin A
2.79min : 131.094792m/z	3.1776	0.000000000255	Perlolyrine
6.08min : 228.093348m/z	0.23596	0.0000000201	Lauryldiethanolamine
6.09min : 196.121163m/z	0.15212	0.00000000395	N.N-Dimethyldodecylamine N-oxide
6.44min : 197.095379m/z	8.4217	0.000000000000211	Diisobutyl phthalate
6.48min : 262.132229m/z	0.47842	0.00000149	PE 32:2; PE 16:1-16:1; [M+H]+
6.64min : 416.206706m/z	0.17718	0.0000000363	L-Glutamate
6.65min : 410.253053m/z	0.12466	0.000000000032	O-acetyl-L-homoserine
6.66min : 119.037182m/z	0.16814	0.000000000000000113	Caprolactam
6.73min : 243.122699m/z	0.082126	0.00000000000222	trans-4-Coumaric acid
6.91min : 474.214779m/z	0.01889	0.0000000000524	Pyridindolol
7.24min : 837.439648m/z	0.059694	2.27E-20	Barnesin A
7.56min : 1078.602513m/z	0.026591	0.00000000000000398	Isariin D
9.63min : 270.181051m/z	9.6109	0.0000000000193	PE 32:1; PE 16:0-16:1; [M+H]+
9.65min : 316.165326m/z	2.308	0.000871	N-Methyl-1-deoxynojirimycin
